# Supplementary material
Source: Springer Nature journal article supplement (https://www.springermedizin.de/resource/supplementary/12874_2011_740_MOESM8_ESM.pdf/9432830)

Classical Estimate

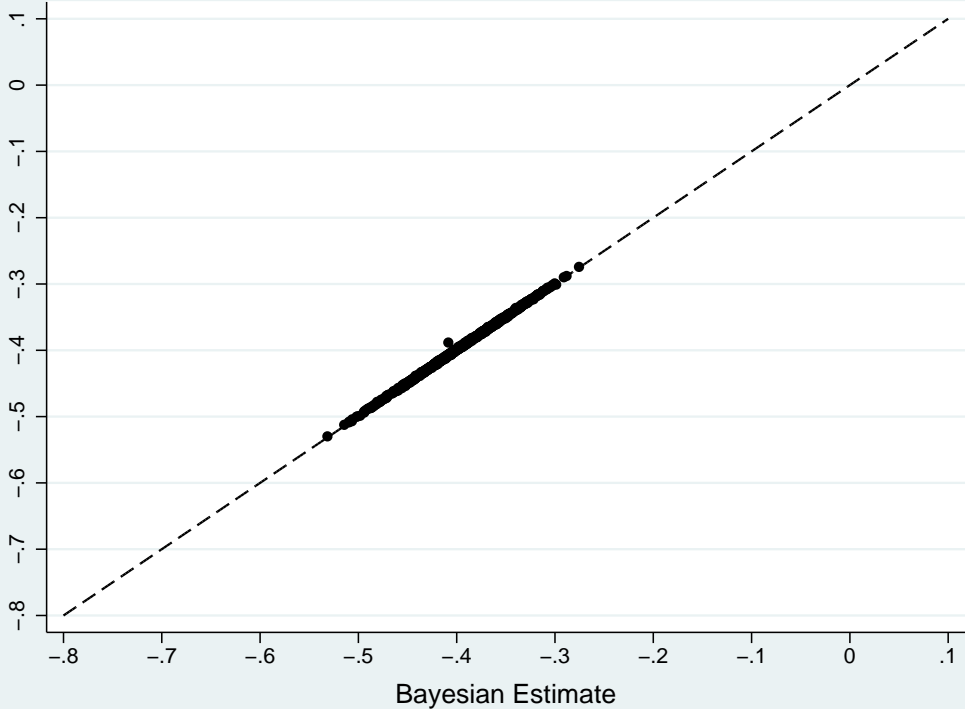

Supplement: MOESM8 [file 9432830]
